# Supplementary material
Source: PubMed Central journal article supplement (PMC3541287)
Supplement: auto-8-1769-s01.pdf [file auto-8-1769-s01.pdf]

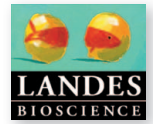

## **Supplemental Material to:**

**Enrico Desideri, Giuseppe Filomeni and Maria Rosa Ciriolo**

**Glutathione participates in the modulation  
of starvation-induced autophagy in carcinoma cells**

**Autophagy 2012; 8(12)**

**<http://dx.doi.org/10.4161/auto.22037>**

**[www.landesbioscience.com/journals/autophagy/article/22037](http://www.landesbioscience.com/journals/autophagy/article/22037)**

Figure S1

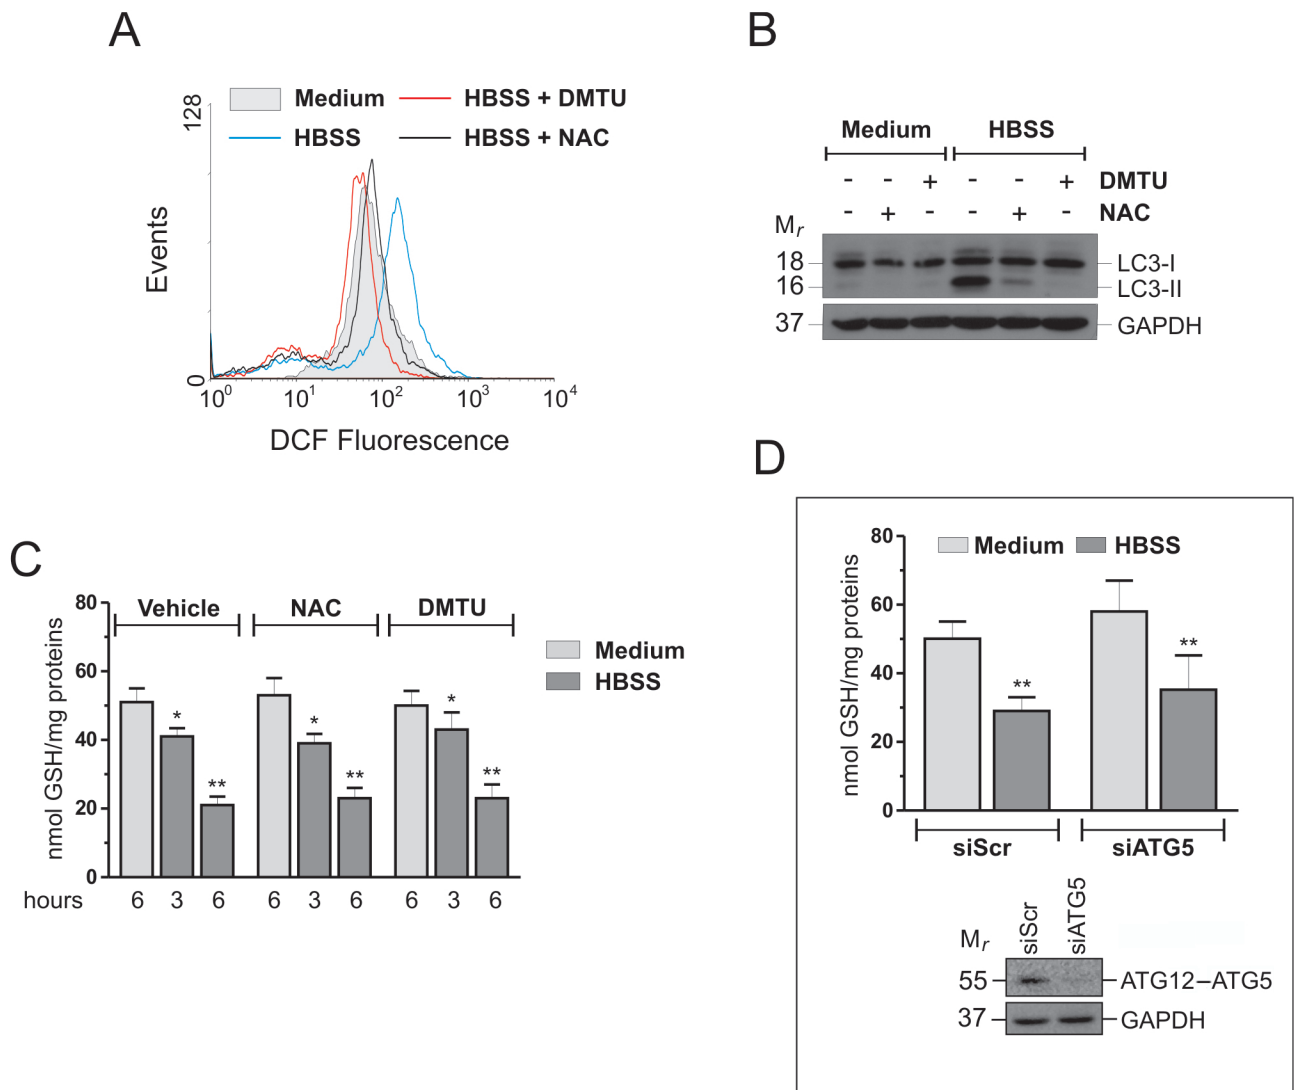

Figure S2

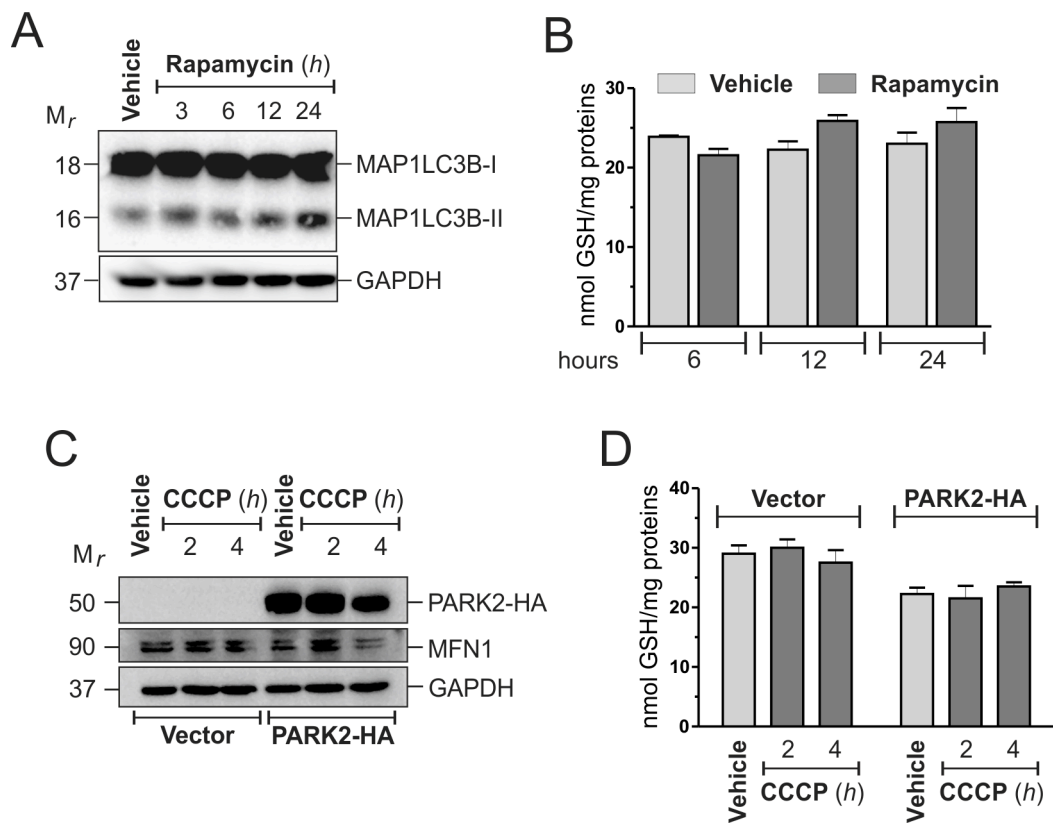

Figure S3

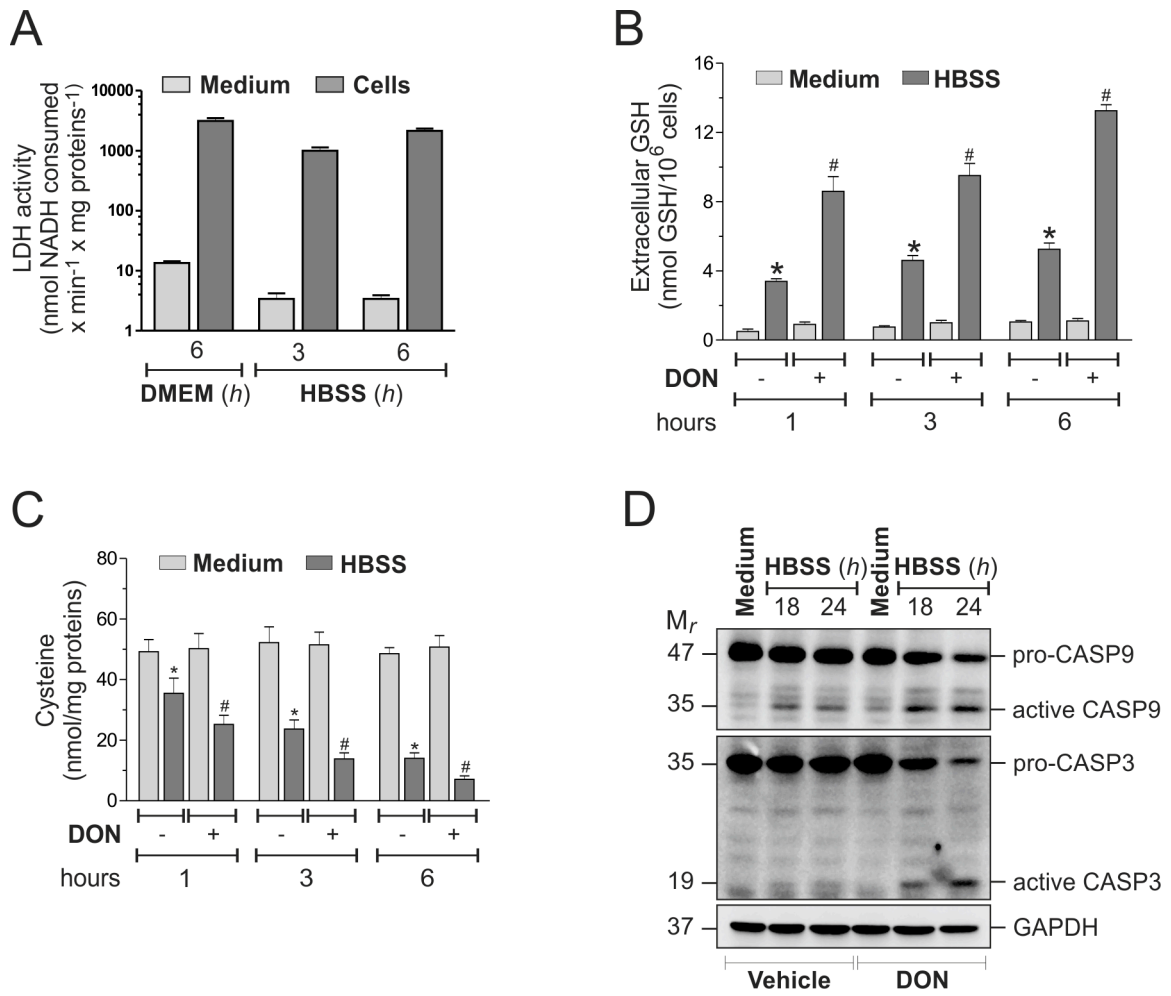

Figure S4

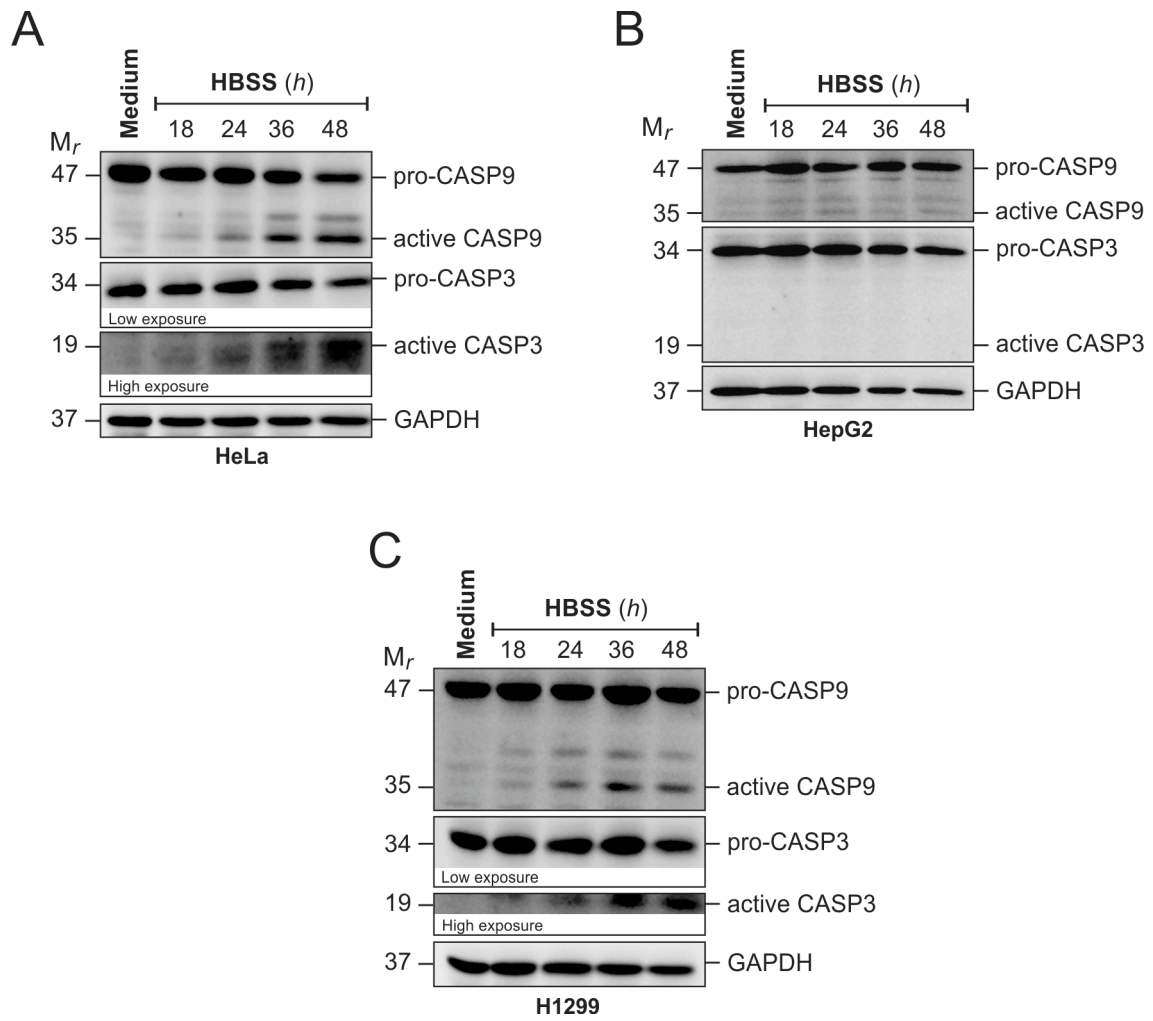

Figure S5

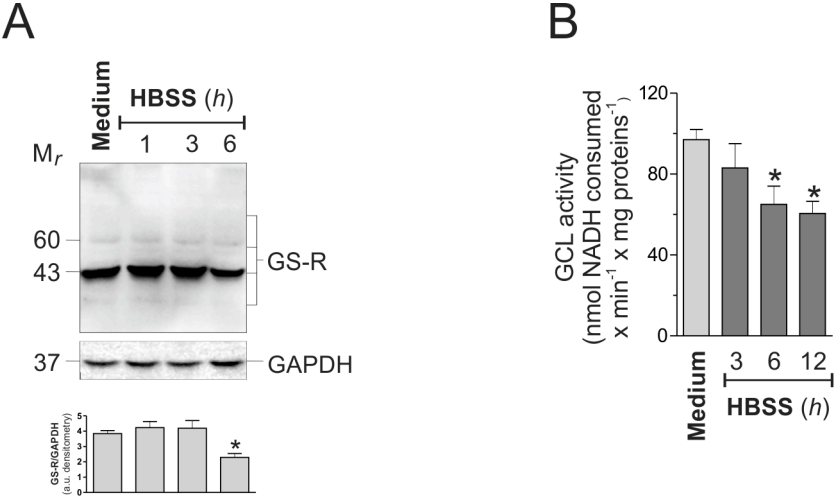

Figure S6

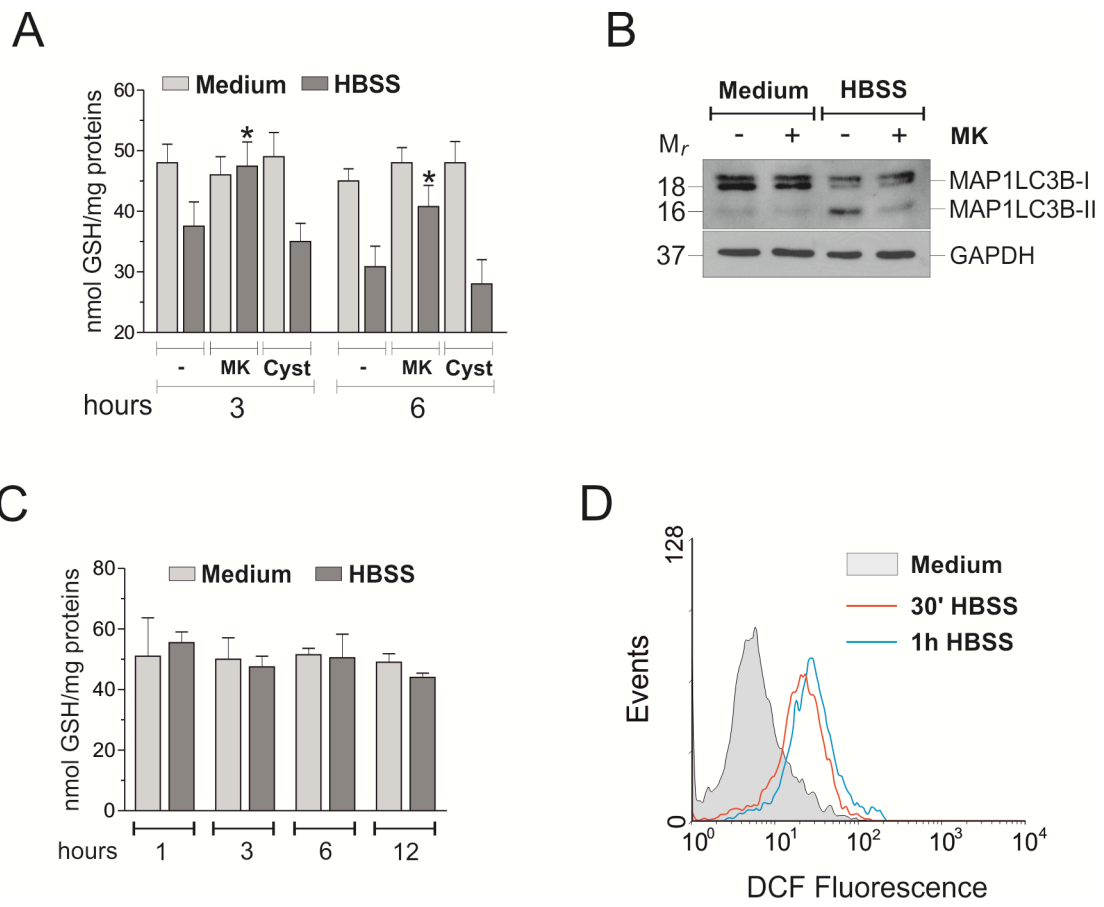

Figure S7

A

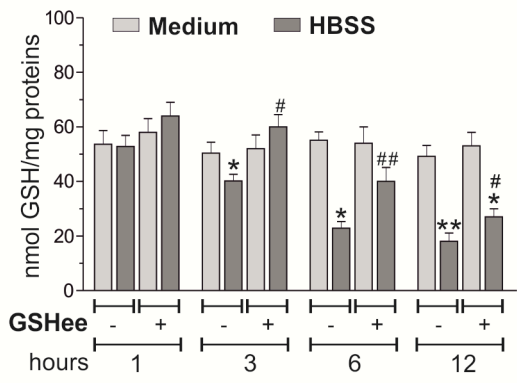

B

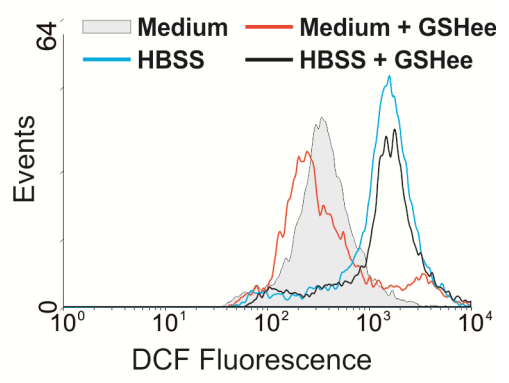

C

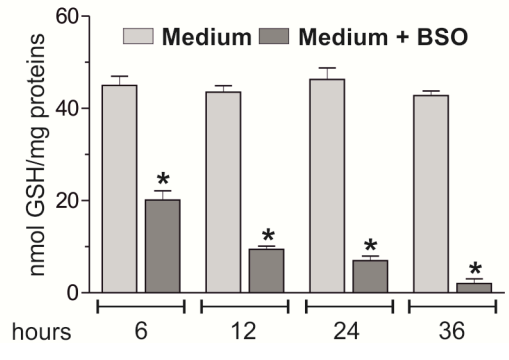

D

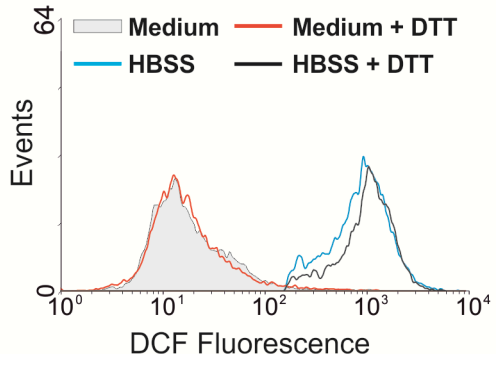



Figure S1.

(A) HeLa cells were starved for 1 h with HBSS, HBSS supplemented with 5 mM NAC or HBSS supplemented with 20 mM DMTU. Thirty minutes before the end of the experimental time cells were incubated with 50  $\mu$ M H<sub>2</sub>-DCFDA and cytofluorometrically analyzed for intracellular ROS content. Cytofluorometric histograms are from one experiment out of five that gave similar results. (B) HeLa cells were starved as in (A). After 3 h, 50  $\mu$ g of total protein extract were loaded onto each lane for detection of MAP1LC3B. GAPDH was used as loading control. (C) HeLa cells were starved as in (A). At indicated times, cells were harvested and intracellular GSH was determined by HPLC analysis. Data are expressed as nmoles of GSH/mg of proteins and represent the mean  $\pm$  SD of n = 5 independent experiments. \*p < 0.05 against medium. \*\*p < 0.01 against medium. (D) HeLa cells were transfected with either a nontargeting siRNA (siScr) or an siRNA targeting ATG5 (siATG5), starved for 6 h and intracellular GSH levels determined as in (C). \*p < 0.05 against medium. #p < 0.05 against siScr HBSS (upper panel). Concomitantly, siScr and siATG5 cells were harvested and lysed. Twenty-five  $\mu$ g of total protein extract were loaded onto each lane for detection of ATG5. GAPDH was used as loading control (lower panel). Western blots are from one experiment representative of three that gave similar results.

Figure S2.

(A) HeLa cells were treated with 500 nM rapamycin for the indicated times. Fifty  $\mu$ g of total protein extract were loaded onto each lane for detection of MAP1LC3B. GAPDH was used as loading control. Western blots are from one experiment representative of three that gave similar results. (B) HeLa cells were treated with 500 nM rapamycin. At indicated times, cells were harvested and intracellular GSH was determined by HPLC analysis. Data are expressed as nmoles of GSH/mg of proteins and represent the mean  $\pm$  SD of n = 3 independent experiments. (C) HeLa cells were transfected with either a PARK2-HA-containing plasmid or an empty vector. Twelve hours after transfection, cells were treated with 20  $\mu$ M CCCP for the indicated times. Thirty  $\mu$ g of total protein extract were loaded onto each lane for detection of MFN1. GAPDH was used as loading

control and HA was used as transfection control. Western blots are from one experiment representative of three that gave similar results. Alternatively (D), cells were harvested and intracellular GSH was determined by HPLC analysis. Data are expressed as nmoles of GSH/mg of proteins and represent the mean  $\pm$  SD of n = 3 independent experiments.

#### Figure S3.

(A) HeLa cells were starved with HBSS. At indicated times, cells and 500  $\mu$ l of medium were collected and LDH activity determined spectrophotometrically following the oxidation of NADH at 340 nm. Data are expressed as nmoles of NADH consumed  $\times$  min<sup>-1</sup>  $\times$  mg proteins<sup>-1</sup> and represent the mean  $\pm$  SD of n = 3 independent experiments. (B) HeLa cells were starved with HBSS or HBSS supplemented with 1 mM DON. At indicated times, 500  $\mu$ l of cell medium was collected and GSH determined by HPLC. Data are expressed as nmoles of GSH/ $10^6$  cells and represent the mean  $\pm$  SD of n = 5 independent experiments. \*p < 0.05 against medium. #p < 0.05 against HBSS. (C) HeLa cells treated as in (B). At indicated times, cells were harvested and intracellular cysteine was determined by HPLC analysis. Data are expressed as nmoles of cysteine/mg of proteins and represent the mean  $\pm$  SD of n = 3 independent experiments. \*p < 0.05 against control. #p < 0.05 against HBSS. (D) HeLa cells were starved with HBSS or HBSS supplemented with 1 mM DON for the indicated times. Twenty-five  $\mu$ g of total protein extract were loaded onto each lane for detection of pro and active forms of CASP3 and CASP9. GAPDH was used as loading control. Western blots are from one experiment representative of three that gave similar results.

#### Figure S4.

HeLa (A), HepG2 (B) and H1299 (C) cells were starved with HBSS for the indicated times. Twenty-five  $\mu$ g of total protein extract were loaded onto each lane for detection of pro and active forms of CASP3 and CASP9. GAPDH was used as loading control. Western blots are from one experiment representative of three that gave similar results.

Figure S5.

(A) HeLa cells were starved with HBSS. At indicated times, 30  $\mu\text{g}$  of total protein extract were loaded onto each lane for detection of glutathionylated proteins (GS-R). GAPDH was used as loading control (upper panel). Densitometric analysis of GS-R levels normalized to GAPDH. \* $p < 0.05$  against medium (bottom panel). (B) HeLa cells were starved with HBSS. At indicated times, cells were collected and GCL activity determined spectrophotometrically following the oxidation of NADH at 340 nm. Data are expressed as nmoles of NADH consumed  $\times \text{min}^{-1} \times \text{mg proteins}^{-1}$  and represent the mean  $\pm$  SD of  $n = 3$  independent experiments. \* $p < 0.05$  against medium.

Figure S6.

(A) HeLa cells were starved with HBSS, HBSS supplemented with 5  $\mu\text{M}$  MK571 (MK) or HBSS supplemented with 1 mM cystathionine (Cyst). At indicated times, cells were harvested and intracellular GSH was determined by HPLC analysis. Data are expressed as nmoles of GSH/mg of proteins and represent the mean  $\pm$  SD of  $n = 5$  independent experiments. \* $p < 0.05$  against HBSS. (B) HeLa cells were starved with HBSS or HBSS supplemented with 5 mM MK. After 3 h of starvation, 50  $\mu\text{g}$  of total protein extract were loaded onto each lane for detection of MAP1LC3B. GAPDH was used as loading control. Western blots are from one experiment representative of three that gave similar results. (C) MCF-7 cells were starved with HBSS. At indicated times, cells were harvested and intracellular GSH was determined by HPLC analysis. Data are expressed as nmoles of GSH/mg of proteins and represent the mean  $\pm$  SD of  $n = 5$  independent experiments. (D) MCF-7 cells were starved with HBSS for the indicated times. Thirty minutes before the end of the experimental time cells were incubated with 50  $\mu\text{M}$  H<sub>2</sub>-DCFDA and cytofluorometrically analyzed for intracellular ROS content. Cytofluorometric histograms are from one experiment out of five that gave similar results.

Figure S7.

(A) HeLa cells were starved with HBSS or HBSS supplemented with 10 mM GSHee. At indicated times, cells were harvested and intracellular GSH was determined by HPLC analysis. Data are expressed as nmoles of GSH/mg of proteins and represent the mean  $\pm$  SD of  $n = 5$  independent experiments. \* $p < 0.05$  against medium. \*\* $p < 0.01$  against medium. # $p < 0.05$  against HBSS. ## $p < 0.01$  against HBSS. (B) HeLa cells were starved for 1 h with HBSS or HBSS supplemented with 10 mM GSHee. Thirty minutes before the end of the experimental time, cells were incubated with 50  $\mu$ M H<sub>2</sub>-DCFDA, and analyzed for intracellular ROS content. Cytofluorometric histograms are from one experiment out of five that gave similar results. (C) HeLa cells were treated with 1 mM BSO. At indicated times, cells were harvested and intracellular GSH was determined by HPLC analysis. Data are expressed as nmoles of GSH/mg of proteins and represent the mean  $\pm$  S.D. of three different experiments. \* $p < 0.05$  against medium. (D) HeLa cells were starved with HBSS or HBSS supplemented with 1 mM DTT for 1 h and analyzed as in (B). Cytofluorometric histograms are from one experiment out of five that gave similar results.
